# Supplementary material
Source: publisher site journal article supplement (https://www.degruyterbrill.com/publication/journal_key/ZSTW/downloadAsset/ZSTW_ZSTW_Jahresregister_2020.pdf)
Supplement: Supplementary file 1 [file ZSTW_ZSTW_Jahresregister_2020.pdf]

# ZEITSCHRIFT FÜR DIE GESAMTE STRAFRECHTSWISSENSCHAFT MIT AUSLANDSRUNDSCHAU

## GESAMTSCHRIFTFLEITUNG

Prof. Dr. Dr. Dres. h.c. *Kristian Kühl*, Tübingen

## REDAKTION

Inlandsteil: Prof. Dr. *Jörg Eisele*, Tübingen

Auslandsrundschauf: Dr. *Marc Engelhart*, Freiburg i. Br.  
Dr. *Benjamin Vogel*, Freiburg i. Br.

Mitarbeiter: Dr. *Alexander Bechtel*, Tübingen (Inlandsteil)  
*Ines Hofmann*, Freiburg i. Br. (Auslandsrundschauf)

## HERAUSGEGEBEN VON

Prof. Dr. *Helmut Fuchs*, Wien

Prof. Dr. *Tatjana Hörnle*, Freiburg i. Br.

Prof. Dr. Dr. Dres. h.c. *Kristian Kühl*, Tübingen

Prof. Dr. Dres. h.c. *Ulfrid Neumann*, Frankfurt a. M.

Prof. Dr. *Thomas Rönnauf*, Hamburg

Prof. Dr. *Frank Saliger*, München

Prof. Dr. Dr. h.c. mult. *Bernd Schünemann*, München

Prof. Dr. Dr. h.c. mult. *Ulrich Sieber*, Freiburg i. Br.

Prof. Dr. *Carl-Friedrich Stuckenberg*, Bonn

Prof. Dr. *Thomas Weigend*, Köln

## IN VERBINDUNG MIT

Prof. Dr. Dr. h.c. *Manfred Burgstaller*, Wien

Prof. Dr. Dr. h.c. mult. *Albin Eser*, Freiburg i. Br.

Prof. Dr. Dr. h.c. mult. *Günther Jakobs*, Bonn

Prof. Dr. Dr. h.c. *Heinz Müller-Dietz*, Sulzburg

Prof. Dr. Dr. h.c. mult. *Claus Roxin*, München

Prof. Dr. Dr. h.c. mult. *Klaus Tiedemann* (†), Staufen

## JOURNAL MANAGER

*Alexander Görlt*, De Gruyter, Berlin

**DE GRUYTER**

# Inhaltsverzeichnis des 132. Bandes der Zeitschrift für die gesamte Strafrechtswissenschaft

## I. Abhandlungen

- 1** Abschied vom naturalistischen Verbrechensbegriff in der Lehre von den Konkurrenzen  
Von Prof. Dr. *Ingeborg Puppe*, Bonn
  - 24** Die Kronzeugenregelung in Deutschland  
Von Prof. Dr. Dr. h.c. *Kai Ambos*, Göttingen
  - 56** Staatliche Macht und Ohnmacht – Zum Schutz von Allgemeingütern im Strafrecht im Zusammenhang mit staatlichem Versagen  
Von Dr. *Maximilian Lenk*, Tübingen
  - 84** Aufsatz: Die Sicherheit im Staatsschutzstrafrecht  
Von Dr. *Matthias Fahrner*, M.A., Konstanz
  - 102** Faire Strafverfahren vor systemisch abhängigen Gerichten?  
Von Dr. *Julia Geneuss*, LL.M., Hamburg, und Dr. *Andreas Werkmeister*, Berlin
  - 133** Die psychiatrische Maßregel nach § 63 StGB im Spannungsfeld von Sicherungsauftrag und Freiheitsanspruch  
Von Dr. *Heinz Kammeier*, Witten/Herdecke
  - 195** Perspektiven der Rechtsvergleichung – Strafrechtsvergleichung, quo vadis?  
Von Privatdozent Dr. *Christoph Zehetgruber*, Universität Bayreuth
- 
- 283** Von Christian Wolffs „Philosophia Practica Universalis“ zur Programmierung von Notstandsalgorithmien  
Von Prof. Dr. *Christoph Wolf*, Wiesbaden
  - 330** Die uneingeschränkte Schuldtheorie beim Erlaubnistatbestandsirrtum – Zur gesetzmäßigen Handhabung der Vermeidbarkeitsklausel des § 17 S. 1 StGB  
Von Dr. *Martin Heuser*, Regensburg
  - 367** Schutz von Dissidenten und Abwehr von Cyberspionage – die neue Bedeutung des § 99 StGB  
Von Prof. Dr. *Christoph Safferling*, LL.M., Nürnberg, und Dr. *Christian Rückert*, Erlangen-Nürnberg
  - 397** Das Jugendstrafrecht der DDR in ihrem letzten Jahrzehnt  
Von Prof. Dr. *Georg Steinberg*, Potsdam
- 
- 521** „Haters gonna hate... (and lawmakers hopefully gonna make something else)“ – Einige Anmerkungen zum Regierungsentwurf zur Bekämpfung der Hasskriminalität  
Von Dr. *Mustafa Temmuz Oglakcioglu*, Erlangen-Nürnberg
  - 544** Zur Regulierung des Internet durch Strafrecht bei Hass und Hetze auf Onlineplattformen  
Von Privatdozent Dr. *Tobias Ceffinato*, Bayreuth
  - 564** Das Regelungsdickicht zur Hasskriminalität in Belgien  
Von Prof. Dr. *Wendy De Bondt*, Gent (Belgien)
  - 596** Hasskriminalität in Polen  
Von Assoc. Professor Dr. *Karolina Kremens*, Breslau (Polen)
  - 616** Gesetzliche Grundlagen zu Hasskriminalität und Hassrede in der Türkei: Kritische Reflexionen  
Von Dr. *Öznur Sevdiren*, Istanbul (Türkei)
  - 644** Den Hass kriminalisieren: Rechtsgrundlagen und Vollzugsdefizite bei der strafrechtlichen Verfolgung von Hassdelikten in den Vereinigten Staaten  
Von Associate Professor *Avlana K. Eisenberg* J.D., Tallahassee (USA)

**II Inhaltsverzeichnis**

**666** Hasskriminalität – Vergleichende Analyse unter Einschluss der deutschen Rechtslage  
Von Prof. Dr. *Brian Valerius*, Bayreuth

**690** Hasskriminalität im Rechtsvergleich – Ein Bericht über die 37. Tagung der Gesellschaft für  
Rechtsvergleichung aus strafrechtlicher Perspektive  
Von *Johannes Block*, *Patricia Kitten*, *Friederike Klimek*, *Christine Untch*, *Jakob Weissinger*,  
Köln, sowie *Sandra Petry*, Düsseldorf

---

**705** Altentötung und Alterssuizid – eine Bestandsaufnahme für die Kriminalpolitik  
Von Prof. Dr. Dr. h.c. *Thomas Hillenkamp*, Göttingen

**742** Ärztliche Triage in Friedenszeiten – Eine kritische Analyse der Strafbarkeitsrisiken im  
Lichte der Implikationen des Grundgesetzes  
Von Dr. *Andrea Elisabeth Busch*, Osnabrück

**780** Zum Beweis des Vorsatzes  
Von *Robert Kaiser*, Dresden

**803** Der Versammlungsbegriff des Strafgesetzbuchs  
Von *Aleksandar Živanic*, Konstanz

**826** Kritische Entwicklungen im Jugendstrafrecht seit 2013  
Von Prof. Dr. *Sabine Swoboda*, Bochum

**891** DNA und Beweiswürdigung – Der statistische Rubikon und die Dogmatik der Identitäts-  
feststellung  
Von Dr. *Kyriakos N. Kotsoglou*, LL.M, FHEA, Newcastle upon Tyne (U.K.), Associate  
Professor Dr. *Alex Biedermann*, Lausanne (Schweiz) und Prof. Dr. *Joëlle Vuille*, Fribourg  
(Schweiz)

**II. Literaturberichte**

**III. Buchbesprechungen**

**441** Fateh-Moghadam, Bijan: Die religiös-weltanschauliche Neutralität des Strafrechts. Zur  
strafrechtlichen Beobachtung religiöser Pluralität. Mohr Siebeck, Tübingen 2019. XIII,  
Jus Poenale 16, 438 Seiten  
Von Prof. Dr. Dres. h.c. *Ulfrid Neumann*, Frankfurt a.M.

**453** Goeckenjan, Ingke: Revision der Lehre von der objektiven Zurechnung. Eine Analyse  
zurechnungsausschließender Topoi beim vorsätzlichen Erfolgsdelikt. Mohr Siebeck, Tübingen  
2017. XI, Jus Poenale 13, 331 Seiten  
Von Prof. Dr. Dr. h.c. *Kai Ambos*, Göttingen

**938** Burghardt, Boris: Zufall und Kontrolle. Eine Untersuchung zu den Grundlagen der moral-  
philosophischen und strafrechtlichen Zurechnung, Tübingen: Mohr Siebeck, 2018  
Von Prof. Dr. Dres. h.c. *Ulfrid Neumann*, Frankfurt a.M.

**IV. Verzeichnis der Verfasser von Beiträgen**

|                         |                |                     |                 |
|-------------------------|----------------|---------------------|-----------------|
| Ambos, Kai              | <b>24, 453</b> | Neumann, Ulfrid     | <b>441, 938</b> |
| Biedermann, Alex        | <b>891</b>     | Oğlakcioğlu, Temmuz | <b>521</b>      |
| Block, Johannes         | <b>690</b>     | Petry, Sandra       | <b>690</b>      |
| Busch, Andrea Elisabeth | <b>742</b>     | Puppe, Ingeborg     | <b>1</b>        |

|                        |            |
|------------------------|------------|
| Ceffinato, Tobias      | <b>544</b> |
| De Bondt, Wendy        | <b>564</b> |
| Eisenberg, Aylana      | <b>644</b> |
| Fahrner, Matthias      | <b>84</b>  |
| Geneuss, Julia         | <b>102</b> |
| Heuser, Martin         | <b>330</b> |
| Hillenkamp, Thomas     | <b>705</b> |
| Kaiser, Robert         | <b>780</b> |
| Kammeier, Heinz        | <b>133</b> |
| Kitten, Patricia       | <b>690</b> |
| Klimek, Friederike     | <b>690</b> |
| Kotsoglou, Kyriakos N. | <b>891</b> |
| Kremens, Karolina      | <b>596</b> |
| Lenk, Maximilian       | <b>56</b>  |

|                        |            |
|------------------------|------------|
| Rückert, Christian     | <b>367</b> |
| Safferling, Christoph  | <b>367</b> |
| Sevdiren, Öznur        | <b>616</b> |
| Steinberg, Georg       | <b>397</b> |
| Swoboda, Sabine        | <b>826</b> |
| Untch, Christine       | <b>690</b> |
| Valerius, Brian        | <b>666</b> |
| Vuille, Joëlle         | <b>891</b> |
| Weissinger, Jakob      | <b>690</b> |
| Werkmeister, Andreas   | <b>102</b> |
| Wolf, Christoph        | <b>283</b> |
| Zehetgruber, Christoph | <b>195</b> |
| Zivanic, Aleksandar    | <b>803</b> |



## V. Jahresregister der Auslandsrundschau der ZStW, 132. Band, 2020

- 223** Is the Last Laugh on Liszt? – On the Development of the Norwegian System of Criminal  
(1) Sanctions  
Von Prof. *Jørn Jacobsen*, Bergen (Norwegen)
- 250** „Only Yes means Yes“? – Aktuelle Entwicklungen im australischen Sexualstrafrecht und  
(28) Folgerungen für die deutsche Diskussion  
Von Prof. Dr. *Elisa Hoven*, Leipzig, und Prof. *Andrew Dyer*, Sydney (Australien)
- 264** Die strafrechtliche Relevanz der Steuerumgehung in Italien in rechtsvergleichender Per-  
(42) spektive – Ein neuer Maßstab für den Bestimmtheitsgrundsatz?  
Von Dr. *Federico Donelli*, Teramo (Italien)
- 
- 473** Analyse und Kritik der Reform des griechischen Untreuestrafrechts  
(61) Von *Ourania Lykou*, LL.M., München
- 502** Je unberechenbarer, desto weiter? – Zum strafrechtlichen Schutz kollektiver Rechtsgüter vor  
(90) Naturgefahren. Zugleich ein Beitrag zur strafrechtlichen Haftung für Lawinenunfälle in  
Italien  
Von Assoz. Prof. Dr. *Margareth Helfer*, Innsbruck (Österreich)
- 
- 955** Sichtfeld, Entwicklungspfad und Zielbewusstsein – Beobachtungen zur Methodik der chi-  
(109) nesischen Strafrechtsforschung in den letzten 40 Jahren  
Von Prof. Dr. *Tian Hongjie*, Peking (China)
- 980** Zum Transfer der deutschen Strafrechtsdogmatik nach China – Zugleich ein Beitrag zu den  
(134) methodischen Modellen strafrechtstheoretischer Rezeption  
Von *Zhiwei Tang*, LL.M., München und Peking (China)

## VI. Verzeichnis der Verfasser von Beiträgen in der Auslandsrundschau 2020

|                   |       |     |
|-------------------|-------|-----|
| Donelli, Federico | (42)  | 264 |
| Dyer, Andrew      | (28)  | 250 |
| Helfer, Margareth | (90)  | 502 |
| Hongjie, Tian     | (109) | 955 |
| Hoven, Elisa      | (28)  | 250 |
| Jacobsen, Jørn    | (1)   | 223 |
| Lykou, Ourania    | (61)  | 473 |
| Tang, Zhiwei      | (134) | 980 |
